# Supplementary material for: High hydrogen release catalytic activity by quasi-MOFs prepared via post-synthetic pore engineering
Source: Royal Society of Chemistry journal article supplement (doi:10.1039/d1se00661d), 2021-01-01
Supplement: d1se00661d1.pdf [file d1se00661d1.pdf]

Supplementary Information

**High Hydrogen Release Catalytic Activity by Quasi-MOF Prepared via Post-Synthetic Pore Engineering**

Mino Bagheri<sup>a</sup>, Mohammad Yaser Masoomi<sup>a\*</sup>, Esther Domínguez,<sup>b</sup> and Hermenegildo García<sup>b\*</sup>

<sup>a</sup> Department of Chemistry, Faculty of Science, Arak University, Arak 38156-8-8349, Iran Email: [m-masoomi@araku.ac.ir](mailto:m-masoomi@araku.ac.ir)

<sup>b</sup> Instituto Universitario de Tecnología Química, Universitat Politècnica de Valencia-Consejo Superior de Investigaciones Científicas, Av. De los Naranjos s/n, 46022 Valencia, Spain. E-mail: [hgarcia@upv.es](mailto:hgarcia@upv.es)

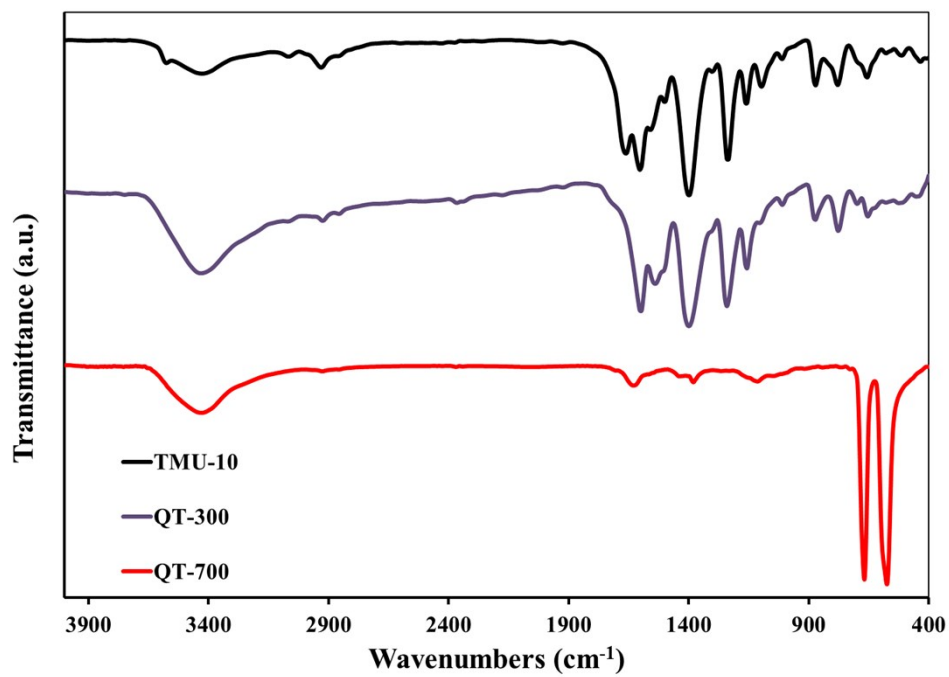

**Figure S1.** IR spectra of TMU-10 and QT-x samples.

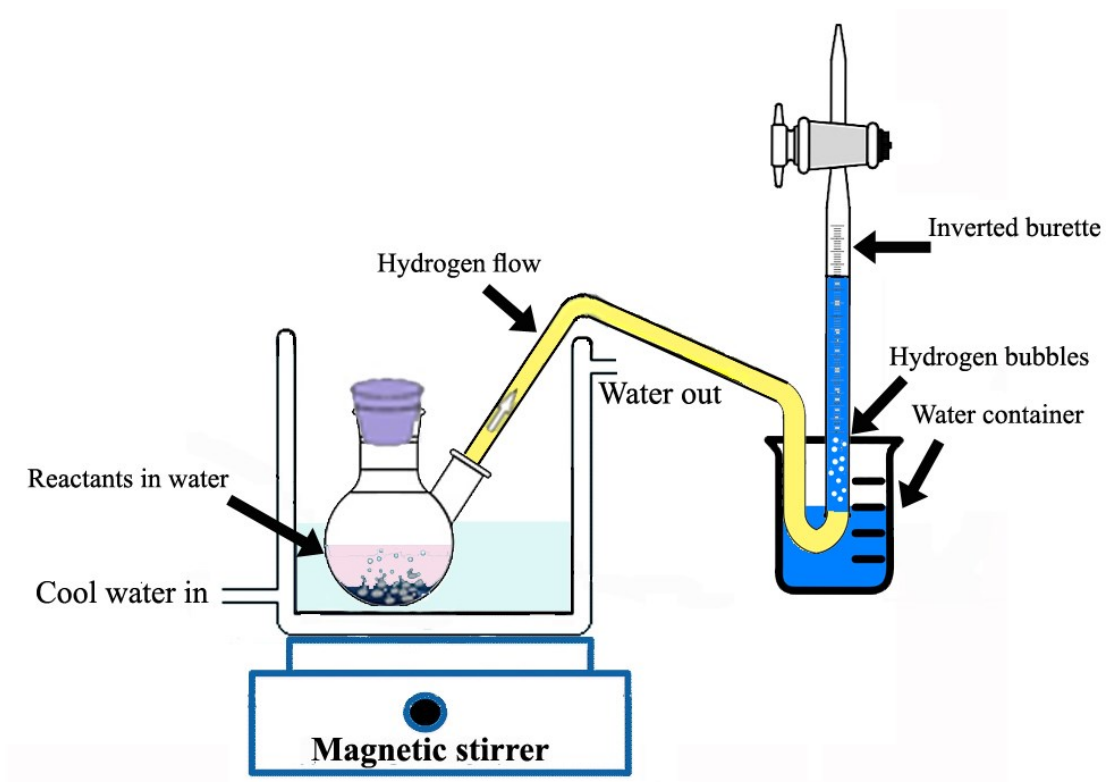

**Figure S2.** Schematic representation of hydrogen generation reaction setup.

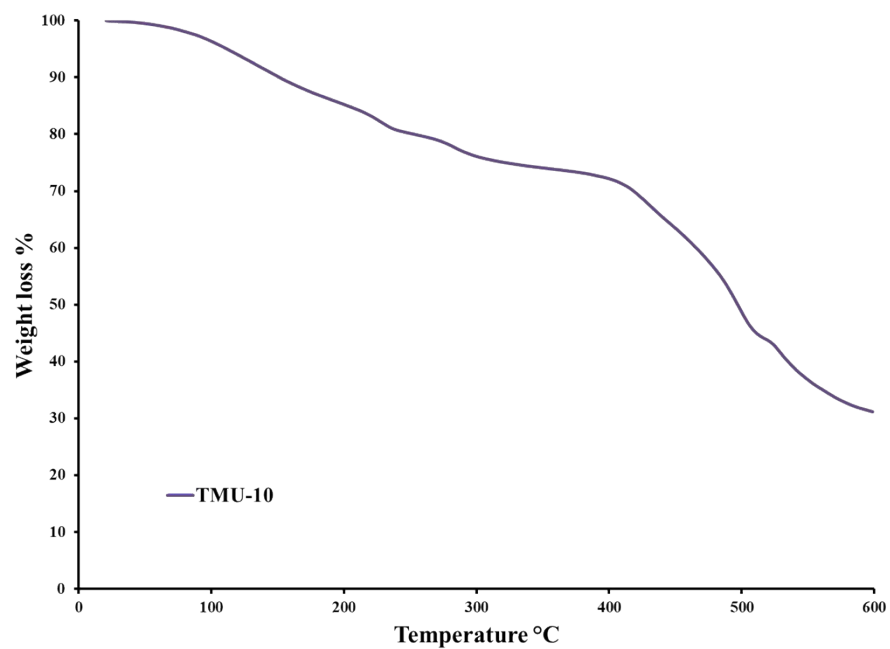

**Figure S3.** Thermogravimetric profiles of TMU-10.

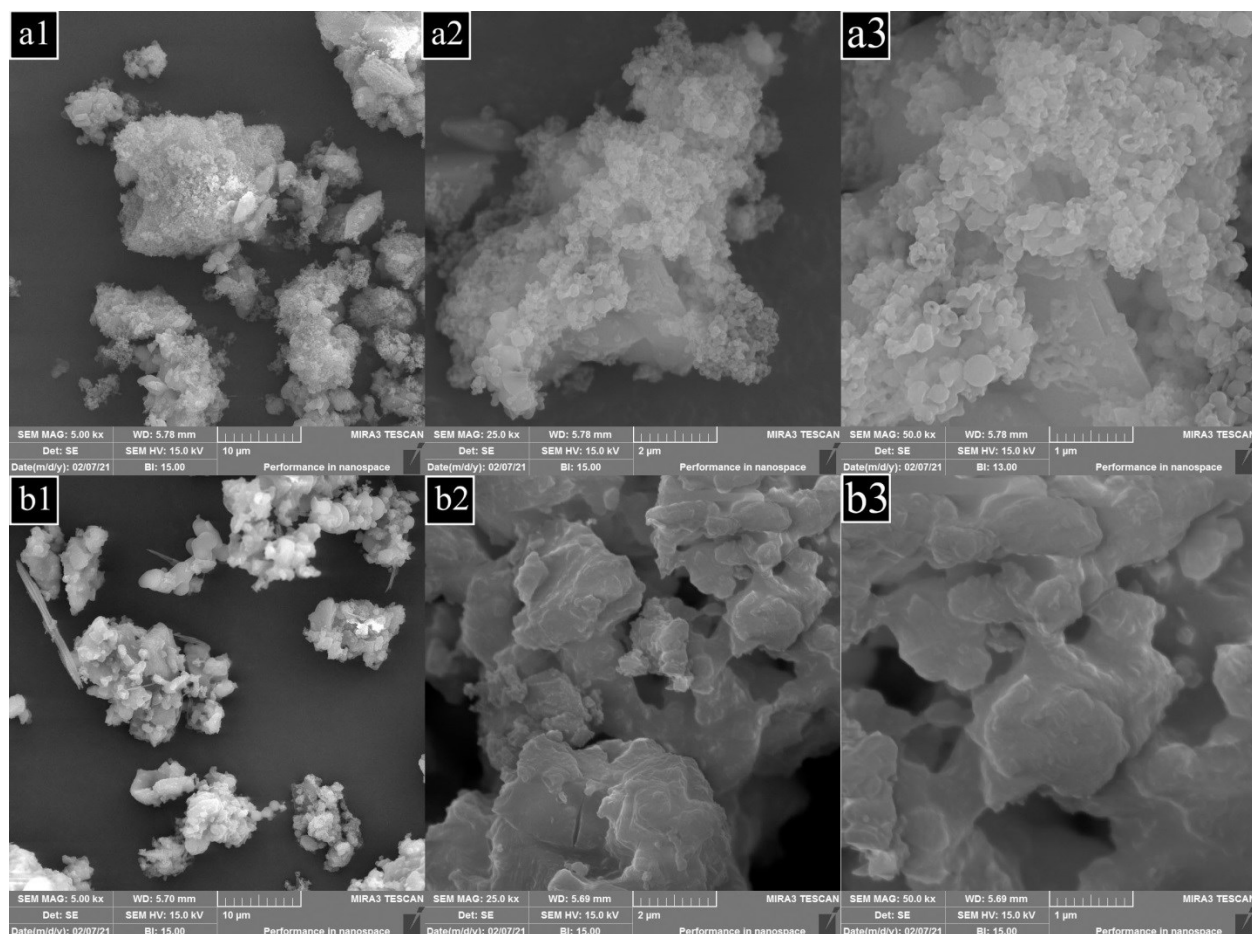

**Figure S4.** FE-SEM images of TMU-10 (a) and QT-300 (b) samples.

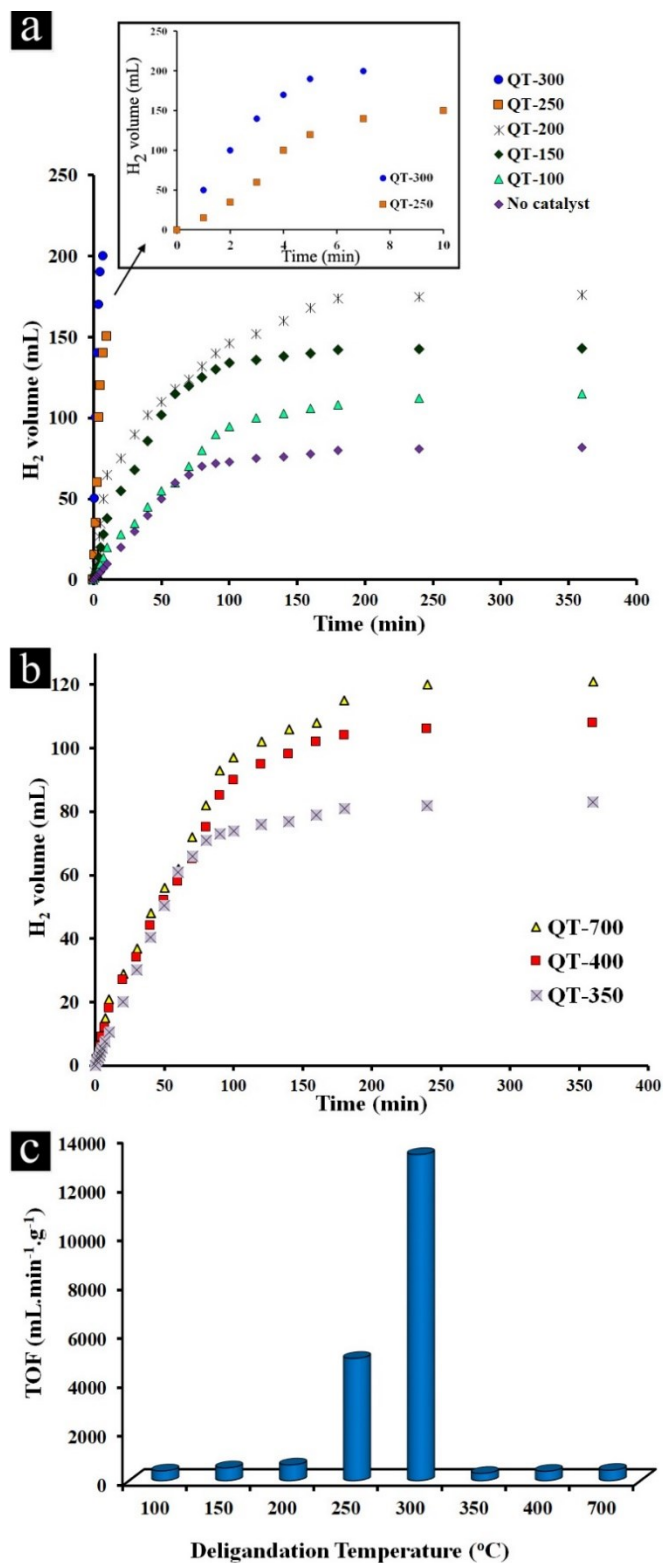

**Figure S5.** Time plots of the hydrolysis of NaBH<sub>4</sub> catalyzed by various QT-x samples at different deligandation temperatures (a, b). Comparison of TOF values related to various QT-x catalysts: experimental conditions [NaBH<sub>4</sub>] = 125 mM, catalyst dosage = 1.5 mg T= RT.

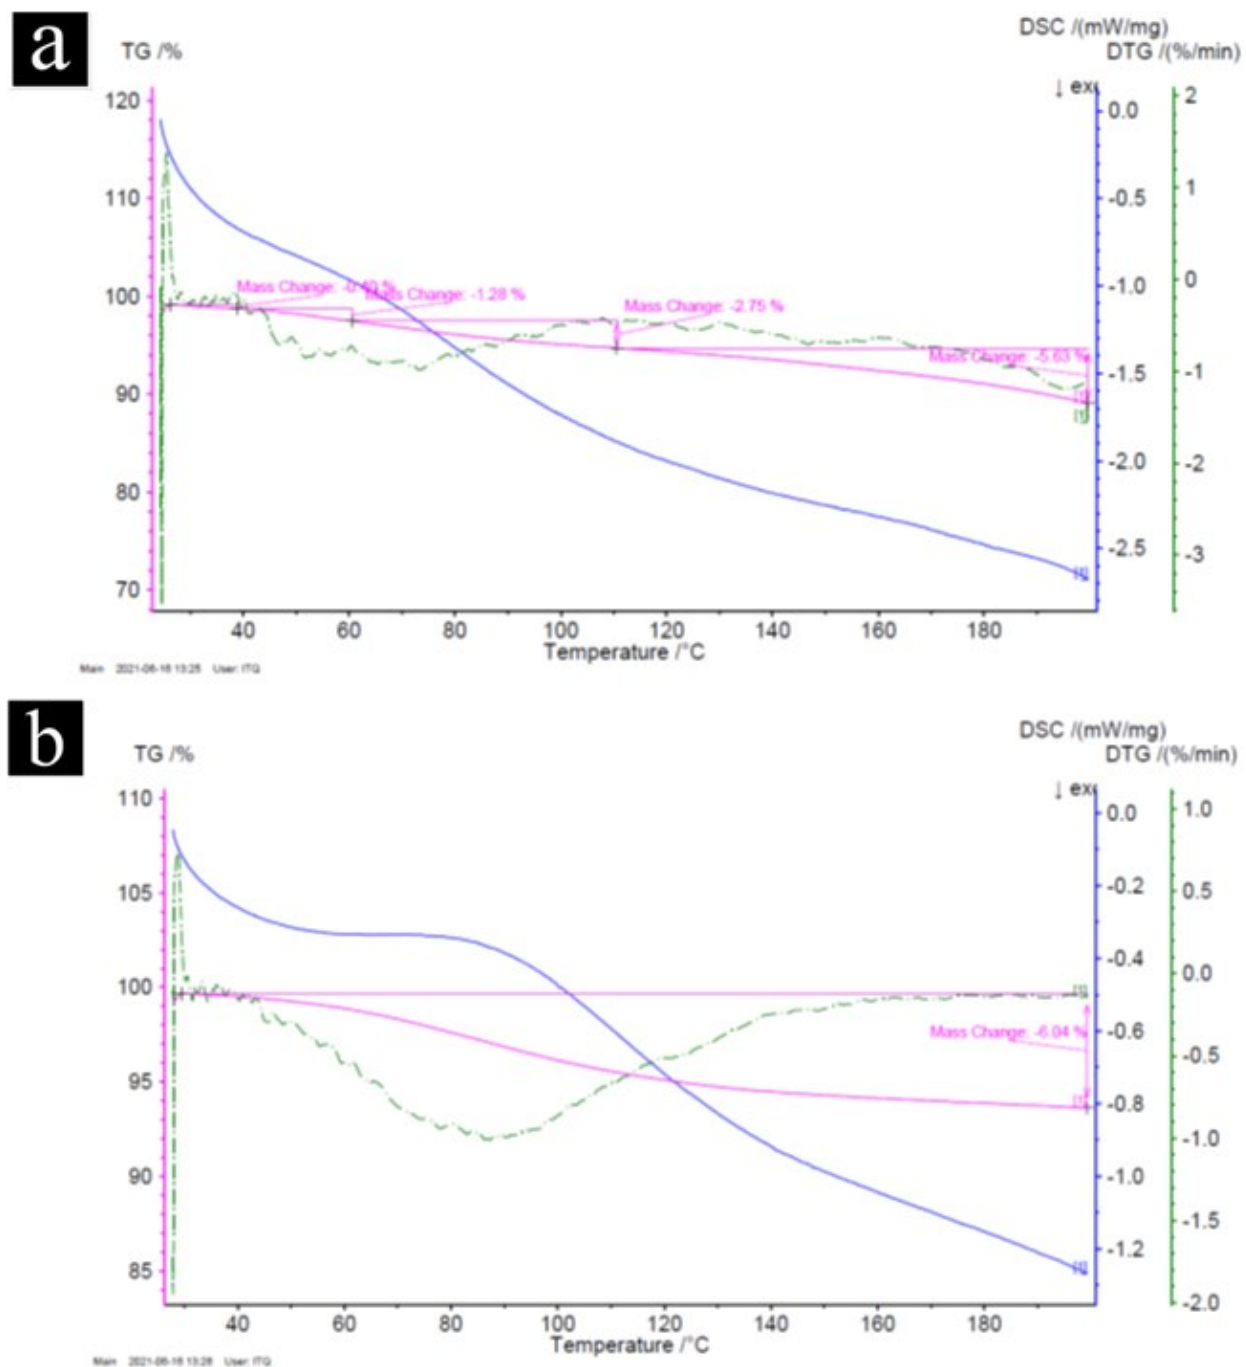

Fig. S6. Thermogravimetric analysis of ambient equilibrated (a) TMU-10 and (b) QT-300 showing their water content related to hydrophilicity.

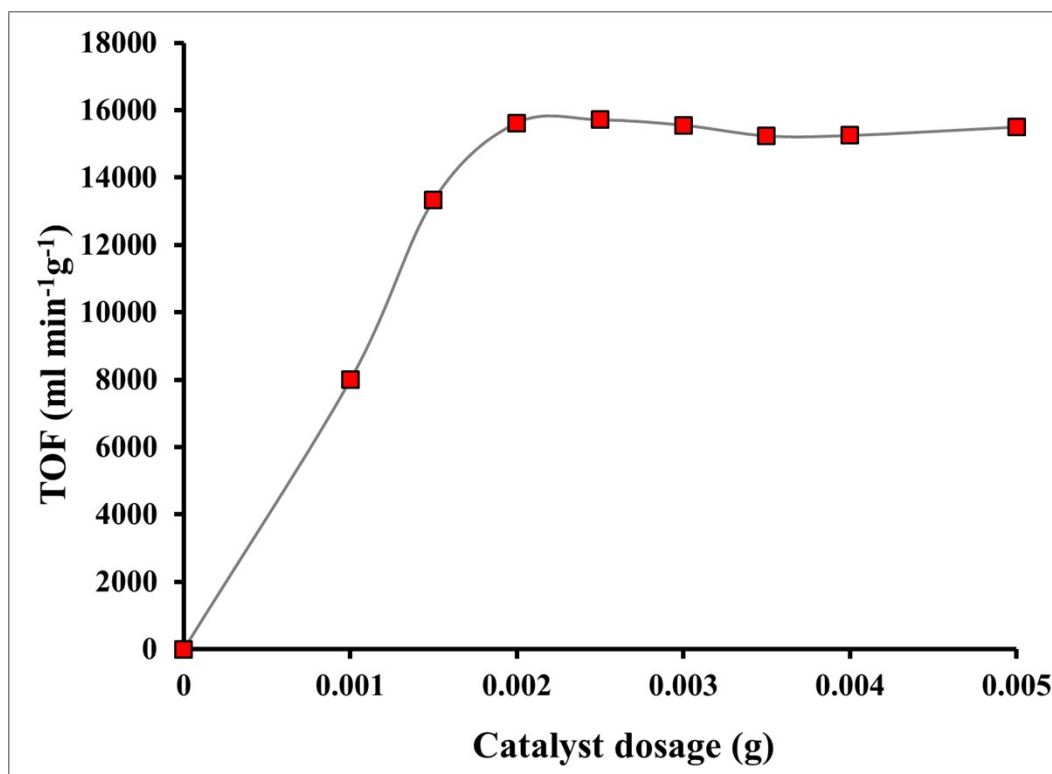

**Figure S7.** TOF values in presence of various amount of QT-300 catalyst.



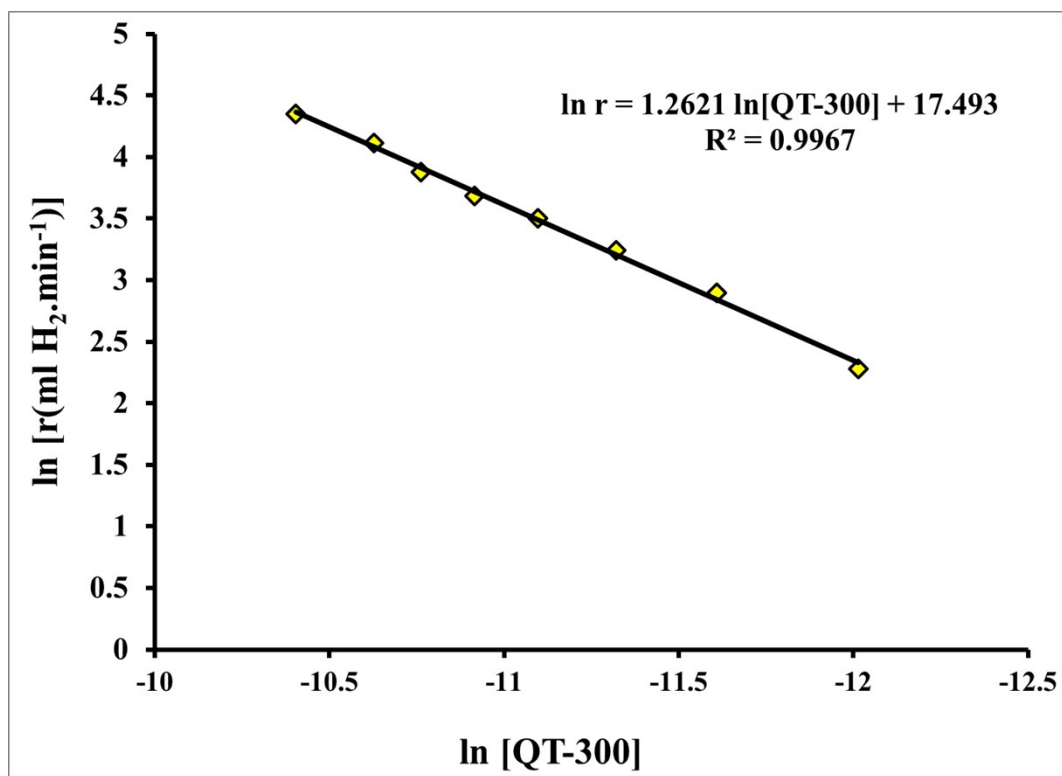

**Figure S8.** Plot of H<sub>2</sub> generation rate versus the concentration of QT-300 catalyst both in natural logarithmic scales.

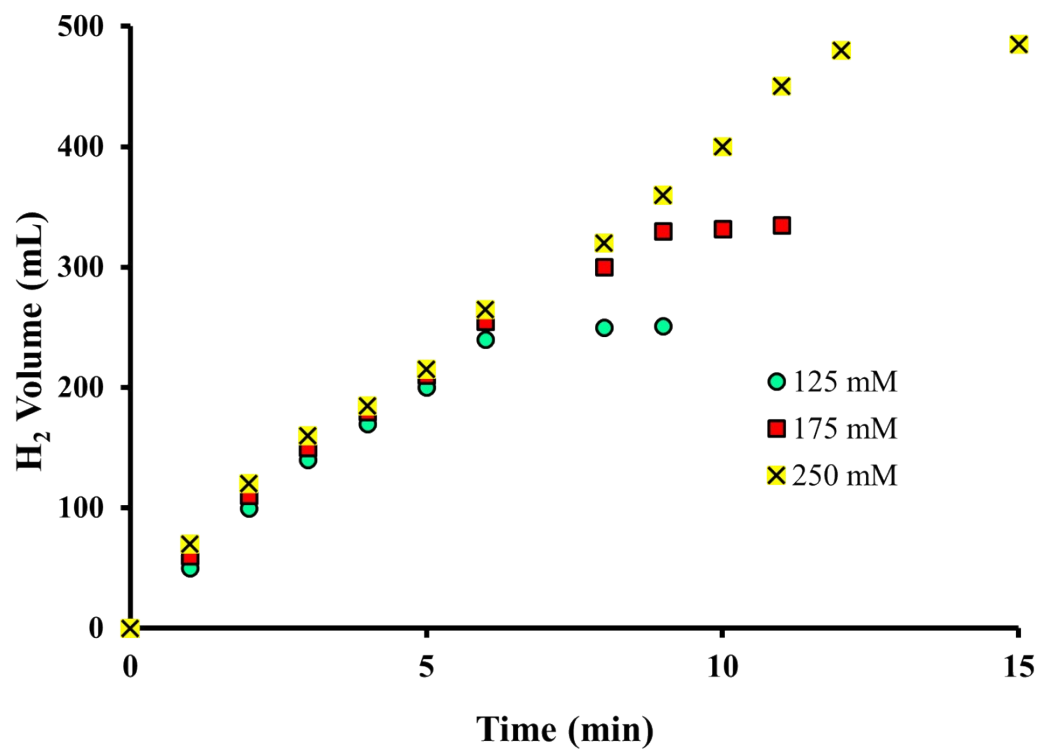

**Figure S9.** The effect of different concentrations of  $\text{NaBH}_4$  on HGR over 2 mg of QT-300 at 25°C.

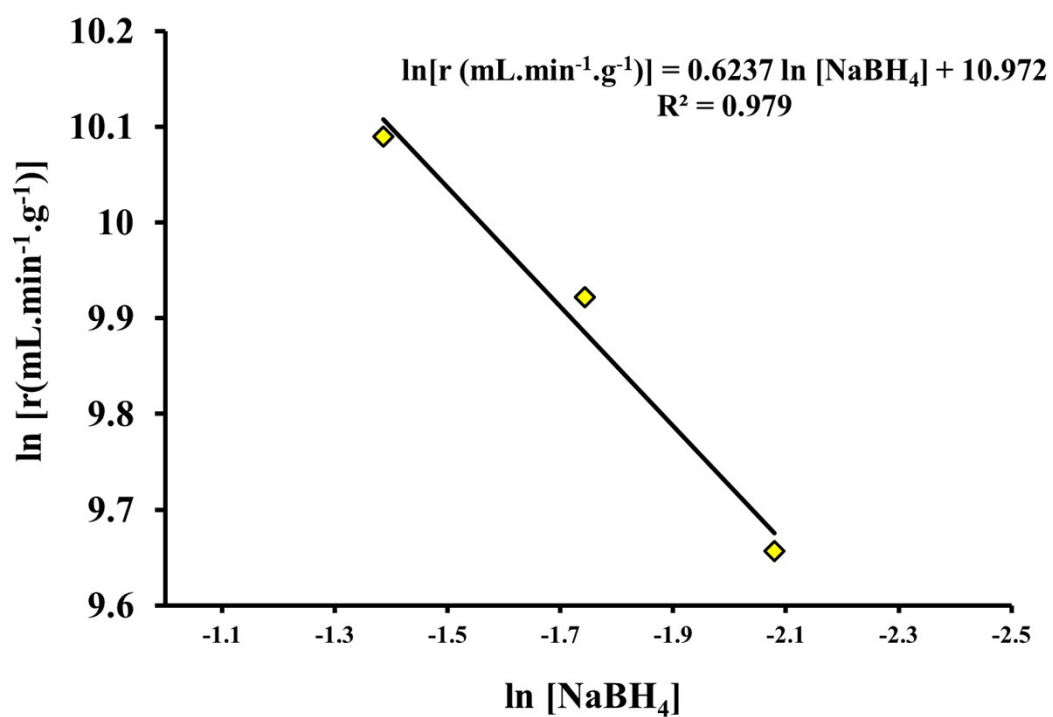

**Figure S10.** Plot of HGR versus the concentration of  $\text{NaBH}_4$  (both in natural logarithmic scale) over QT-300 catalyst at 25 °C.

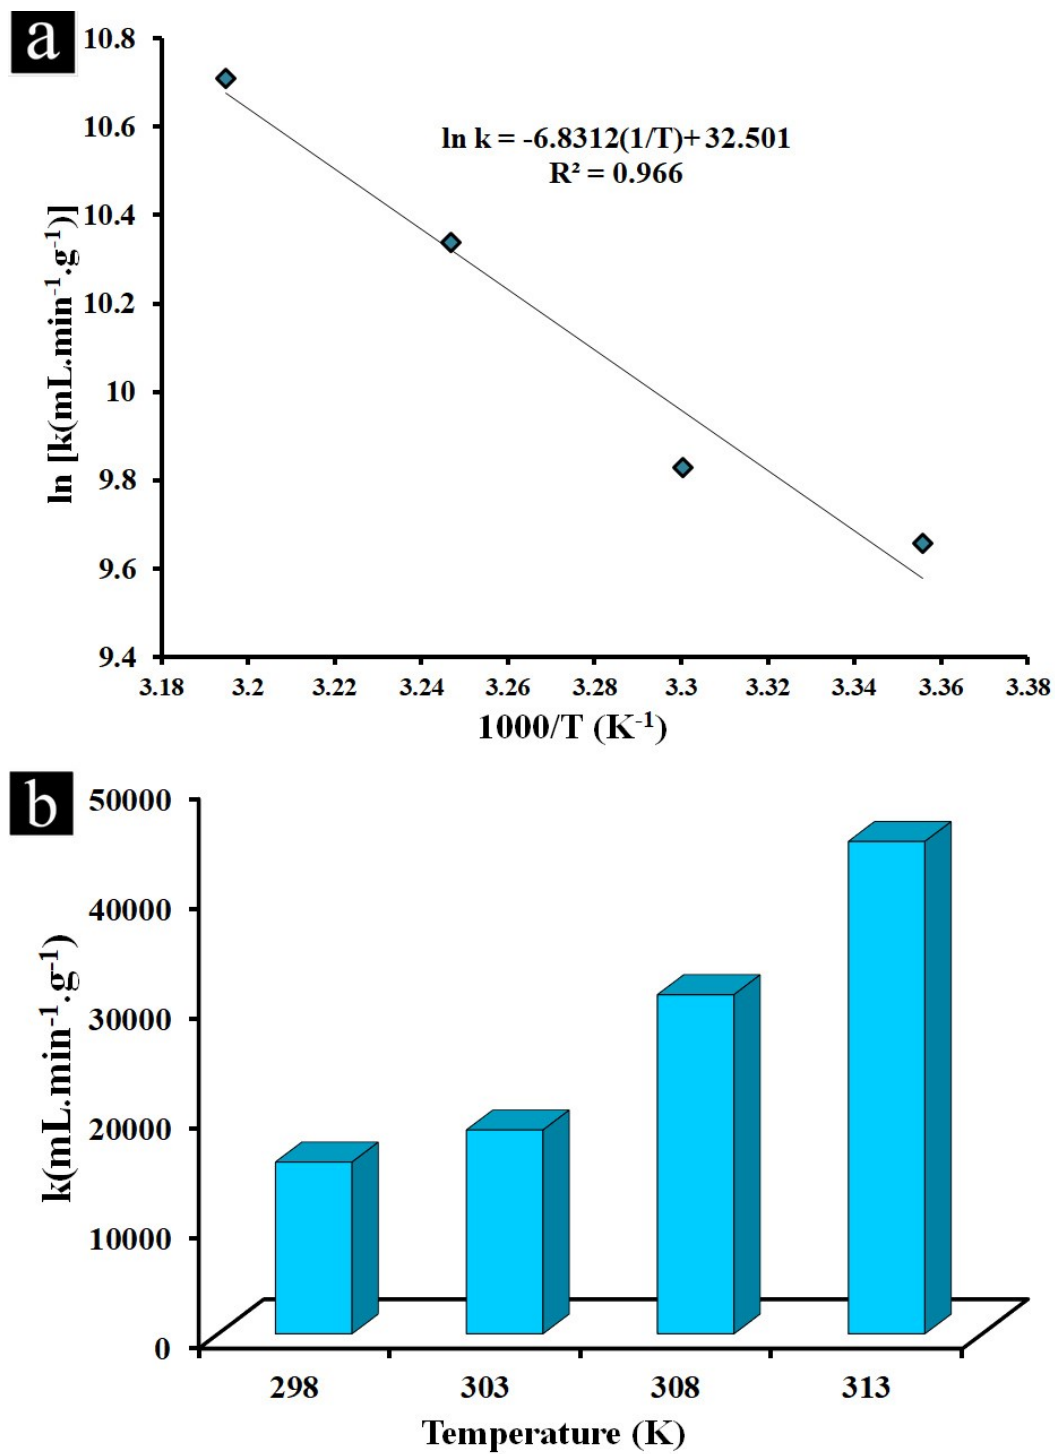

**Figure S11.** Temperature dependence of HGR over 2 mg of QT-300 catalyst,  $[\text{NaBH}_4] = 125$  mM.

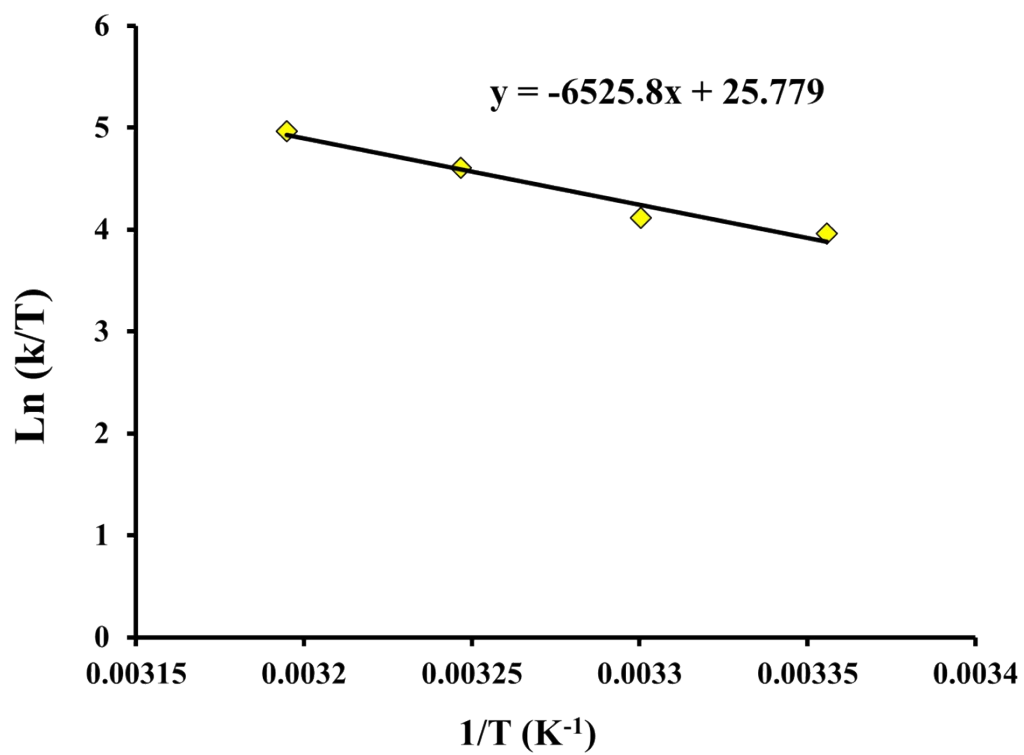

**Figure S12** The Eyring plot for obtaining thermodynamic parameters on HGR over QT-300 catalyst.

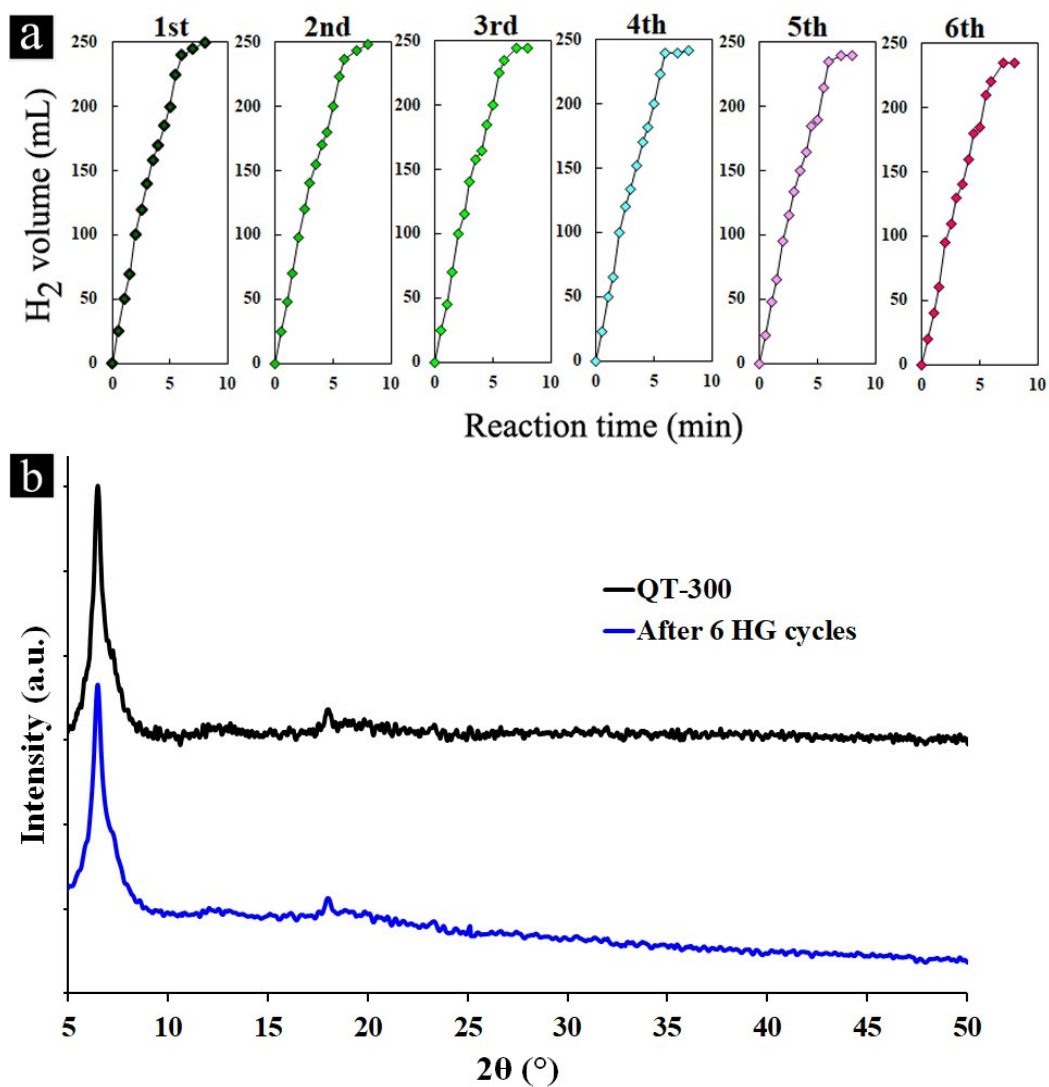

**Figure S13** The reusability of the QT-300 catalyst on  $NaBH_4$  hydrolysis at 25  $^\circ C$  for six catalytic cycles (a) and the XRD pattern of the QT-300 catalyst after six catalytic runs (b).

**Table S1.** BET surface area, total pore volume, micro- and mesopore volume of the synthesized MOFs.

| Sample | $S_{\text{BET}}$ ( $\text{m}^2\text{g}^{-1}$ ) | $V_t$ ( $\text{cm}^3\text{g}^{-1}$ ) | $V_{\text{micro}}$ ( $\text{cm}^3\text{g}^{-1}$ ) | $V_{\text{meso}}$ ( $\text{cm}^3\text{g}^{-1}$ ) |
|--------|------------------------------------------------|--------------------------------------|---------------------------------------------------|--------------------------------------------------|
| TMU-10 | 8.2                                            | 0.023                                | 0.004                                             | 0.023                                            |
| QT-300 | 38.8                                           | 0.157                                | 0.015                                             | 0.142                                            |

**Table S2.** Effect of QT-300 amount as a catalyst on TOF of  $\text{NaBH}_4$  hydrolysis.

| Entry | Catalyst dosage<br>(mg) | TOF<br>( $\text{ml min}^{-1}\text{g}^{-1}$ ) | Time (min) |
|-------|-------------------------|----------------------------------------------|------------|
| 1     | 0                       | *1                                           | 60         |
| 2     | 1                       | 8000                                         | 15         |
| 3     | 1.5                     | 13333.3                                      | 10         |
| 4     | 2                       | 15625                                        | 8          |
| 5     | 3                       | 15555                                        | 6          |
| 6     | 3.5                     | 15238                                        | 6          |
| 7     | 4                       | 15250                                        | 5          |
| 7     | 5                       | 15500                                        | 4          |

Experimental conditions:  $[\text{NaBH}_4] = 125 \text{ mM}$ ,  $T = 25 \text{ }^\circ\text{C}$ . \*HGR in  $\text{mLH}_2\cdot\text{min}^{-1}$ .
